# Supplementary material for: Comparative analyses of tumor immune microenvironment using paired samples from primary non-small cell lung cancer and brain metastases
Source: Research Square preprint supplement (doi:10.21203/rs.3.rs-8278469/v1), 2025-12-13
Supplement: Supplementary file 1 [file 94e91a5377fcb169759fb786.docx]

**Supplementary table 1. Antibodies used for immunohistochemistry.**

| Primary antibody | Clone | Species | Vendor | Catalog number | Dilution | Retrieval Buffer pH | HIER time (temperature [°C], minutes) | Ab incubation (temperature [°C], minutes) |
| --- | --- | --- | --- | --- | --- | --- | --- | --- |
| PD-L1 | E1L3N | rabbit | CST | 13684 | 1:200 | 9.0 | 121, 10 | 4, overnight |
| CD163 | D61U1J | rabbit | CST | 93498 | 1:500 | 6.0 | 121, 10 | 4, overnight |
| CD3 | SP7 | rabbit | abcam | ab16669 | 1:150 | 6.0 | 121, 10 | RT, 60 |
| CD8 | C8/144B | mouse | abcam | ab17147 | 1:100 | 6.0 | 121, 10 | RT, 60 |
| PD-1 | D4W2J | rabbit | CST | 86163 | 1:200 | 9.0 | 121, 10 | 4, overnight |
| FoxP3 | D2W8E | rabbit | CST | 98377 | 1:100 | 6.0 | 121, 10 | RT, 60 |
| PNAd | MECA-79 | mouse | BD | 553863 | 1:1000 | 9.0 | 121, 10 | RT, 60 |

BD, Becton, Dickinson and Company (Franklin Lakes, NJ, USA); CST, Cell Signaling Technology (Danvers, MA, USA); FoxP3, Forkhead Box Protein 3; HIER, Heat-Induced Epitope Retrieval; PD-1, Programmed Cell Death 1; PD-L1, Programmed Cell Death Ligand 1; PNAd, Peripheral Lymph Node Addressin; RT, Room Temperature. abcam (Cambridge, UK).

**Supplementary Fig. 1. Comparison of the tumor immune microenvironment between synchronous and metachronous metastases.**

Box-and-whisker plots comparing tumor-infiltrating lymphocytes subset ratios between the synchronous (s, n=7) and metachronous (m, n=7) groups.

An asterisk indicates *p*<0.05. Prefixes 'i' and 's' denote intratumoral and stromal compartments, respectively. BM, Brain Metastasis; FoxP3, Forkhead Box Protein 3; PD-1, Programmed Cell Death 1; PD-L1, Programmed Cell Death Ligand 1; PNAd, Peripheral Lymph Node Addressin; PT, Primary Tumor; TPS, Tumor Proportion Score.
